# Supplementary material for: Indium silicate with an imandrite-type structure
Source: Royal Society of Chemistry journal article supplement (doi:10.1039/d2ra00864e), 2022-01-01
Supplement: d2ra00864e1.pdf [file d2ra00864e1.pdf]

## SUPPLEMENTARY INFORMATION

### Indium Silicate with an Imandrite-Type of Structure

Stanislav Ferdov,<sup>\*a</sup> Boris Shivachev,<sup>\*b</sup> Rositsa Titorenkova,<sup>b</sup> Nadia Petrova,<sup>b</sup>

Mihail Tarassov<sup>b</sup>, Rosica Nikolova<sup>b</sup>

<sup>[a]</sup>Center of Physics of the Universities of Minho and Porto, University of Minho, 4800-058  
Guimarães, Portugal

<sup>[b]</sup>Institute of Mineralogy and Crystallography, Bulgarian Academy of Sciences, Sofia, 1113,  
Bulgaria

\*Corresponding authors' e-mail address: [sferdov@fisica.uminho.pt](mailto:sferdov@fisica.uminho.pt); [bls@clmc.bas.bg](mailto:bls@clmc.bas.bg)

#### Table of Contents

|                                                                                                                                                                                                                                                                                                                                                                                                                                                                         |   |
|-------------------------------------------------------------------------------------------------------------------------------------------------------------------------------------------------------------------------------------------------------------------------------------------------------------------------------------------------------------------------------------------------------------------------------------------------------------------------|---|
| 1. Scanning electron microscopy (SEM) and quantitative X-ray microanalysis details .....                                                                                                                                                                                                                                                                                                                                                                                | 3 |
| <b>Table S1.</b> Relative standard errors ( $\epsilon_{p-b}$ , p – peak, b – background) and p/b for the measured intensities of NaK $\alpha$ , SiK $\alpha$ , CaK $\alpha$ and InL $\alpha$ in the standards used (calculated according to Scott and Love, 1983 <sup>1</sup> ) .....                                                                                                                                                                                   | 3 |
| <b>Table S2.</b> Elemental composition of the material according to EDS microanalysis data (wt.%) with indicated standard deviations (+1 $\sigma$ ) of measurement of each component, taking into account the measurement errors of the X-ray lines in the unknown and the standard ( $\epsilon^2 = \epsilon_{\text{unknown}}^2 + \epsilon_{\text{STD}}^2$ ) (relative standard errors and standard deviations were calculated according to Scott and Love, 1983) ..... | 3 |
| <b>Figure S1.</b> (a). Morphology of aggregates of intergrown crystals. Unpolished sample. BSE. (b). Cross-section of aggregates of intergrown crystals. All aggregates are characterized by zonal microstructure. Polished sample. BSE.....                                                                                                                                                                                                                            | 4 |
| <b>Figure S2.</b> (a, b). Aggregates of intergrown crystals. Polished samples. BSE images. Rings and numeral symbols in the images indicate the position of points analyzed by EDS. The numeral symbols correspond to the analysis numbers in table 1. ....                                                                                                                                                                                                             | 4 |

|                                                                                                                                                                                                                           |    |
|---------------------------------------------------------------------------------------------------------------------------------------------------------------------------------------------------------------------------|----|
| <b>Figure S3.</b> The final Rietveld pattern for MS-2. The (+) is the measured values and (green ) are the fitted ones; (black -) is the difference between the measured and the fitted values (CSD number 2151073). .... | 5  |
| <b>Figure S4.</b> In situ temperature resolved powder XRD patterns of MS-2 compared with the XRD pattern calculated from the single crystal data. ....                                                                    | 5  |
| <b>Figure S5.</b> Le Bail fits of the powder XRD patterns collected at different temperatures. ....                                                                                                                       | 7  |
| <b>Figure S6.</b> Change of the lattice parameters of MS-2 with increasing temperature.....                                                                                                                               | 7  |
| <b>Figure S7.</b> Powder XRD patterns of a) as-synthesized MS-2 and b) after heating at 900 °C. ....                                                                                                                      | 8  |
| <b>Figure S8.</b> Linear plot of N <sub>2</sub> (77 K, squares and circles) and CO <sub>2</sub> (278 and 293 K, triangles) adsorption and desorption isotherms in In-imandrite (MS-2).....                                | 9  |
| <b>Figure S9.</b> Linear plot of N <sub>2</sub> (77 K, squares and circles) and CO <sub>2</sub> (278 and 293 K, triangles) adsorption and desorption isotherms in Fe-imandrite (MS-1). ....                               | 9  |
| <b>Figure S10.</b> Hydrogen adsorption isotherm of and activated carbon (AC) and MS-2 at 77 and 277 K). ....                                                                                                              | 10 |
| <b>Table S3.</b> Most important data collection and refinement parameters for the studied sample. ....                                                                                                                    | 11 |
| <b>Table S4.</b> Comparison of crystal structure parameters of the mineral imandrite, MS-1, and MS-2.....                                                                                                                 | 12 |
| <b>Table S5.</b> Selected bond lengths (Å), for the studied compounds. ....                                                                                                                                               | 13 |
| <b>References</b> .....                                                                                                                                                                                                   | 14 |

## 1. Scanning electron microscopy (SEM) and quantitative X-ray microanalysis details

**SEM/EDS.** Scanning electron microscopy (SEM) and quantitative X-ray microanalysis with energy dispersive spectrometer (EDS analysis) were performed by using ZEISS SEM EVO 25LS with an EDAX Trident EDS-EBSD-WDS analysis system (Institute of Mineralogy and Crystallography, BAS). EDS analysis was made at selected points (spot analyses) using an EDAX SDD Apollo 10 EDS detector and Genesis V. 6.2. software with ZAF correction method and albite (for Na, Si), anhydrite (for Ca), metal indium (for In) as standards (Astimex Microanalysis Standards). The EDS spectra of the standards and unknowns were recorded at an acceleration voltage of 18 kV and a probe current of 0.98-1.0 nA using a data collection time of 100-120 live seconds and the following geometry: specimen tilt angle - 0°, working distance - 11.5 mm and X-Ray take-off angle - 37.28°. A correction for electron beam current drift was made for each spectrum using a Faraday cap and measuring the sample current. For SEM/EDS study, the particles of the studied material were fixed in epoxy resin pellet and then polished. Another part of the particles was directly fixed on SEM holders. Then all prepared samples were coated with carbon.

**Table S1.** Relative standard errors ( $\epsilon_{p-b}$ , p – peak, b – background) and p/b for the measured intensities of NaK $\alpha$ , SiK $\alpha$ , CaK $\alpha$  and InL $\alpha$  in the standards used (calculated according to Scott and Love, 1983<sup>1</sup>)

| X-Ray line   | $\epsilon_{p-b} * 100\%$ | p/b    | Standard (Astimex Scientific Ltd)                                              |
|--------------|--------------------------|--------|--------------------------------------------------------------------------------|
| NaK $\alpha$ | 1.05                     | 10.283 | Albite<br>NaAlSi <sub>3</sub> O <sub>8</sub><br>Na <sub>2</sub> O - 11.59 wt.% |
| SiK $\alpha$ | 0.37                     | 57.96  | Albite<br>SiO <sub>2</sub> – 64.03 wt.%                                        |
| CaK $\alpha$ | 0.38                     | 38.81  | Anhydrite<br>CaSO <sub>4</sub><br>CaO – 41.11 wt.%                             |
| InL $\alpha$ | 0.30                     | 24.71  | Metal In (100 wt.%)                                                            |

**Table S2.** Elemental composition of the material according to EDS microanalysis data (wt.%) with indicated standard deviations ( $\pm 1\sigma$ ) of measurement of each component, taking into account the measurement errors of the X-ray lines in the unknown and the standard ( $\epsilon^2 = \epsilon_{\text{unknown}}^2 + \epsilon_{\text{STD}}^2$ ) (relative standard errors and standard deviations were calculated according to Scott and Love, 1983)

| N an     | Na <sub>2</sub> O | CaO            | In <sub>2</sub> O <sub>3</sub> | SiO <sub>2</sub> | Sum    | Na                     | Ca              | In              | Si           | Si/In atomic ratio |
|----------|-------------------|----------------|--------------------------------|------------------|--------|------------------------|-----------------|-----------------|--------------|--------------------|
|          | Oxides, wt.%      |                |                                |                  |        | Atoms per formula unit |                 |                 |              |                    |
| 1. dark  | 27.54<br>+0.34    | 12.65<br>+0.12 | 12.22<br>+0.16                 | 49.26<br>+0.29   | 101.67 | 13.006<br>+0.161       | 3.300<br>+0.031 | 1.288<br>+0.017 | 12<br>+0.071 | 9.32±0.13          |
| 2. dark  | 25.76<br>+0.31    | 13.50<br>+0.11 | 11.09<br>+0.14                 | 49.86<br>+0.27   | 100.21 | 12.018<br>+0.145       | 3.482<br>+0.028 | 1.156<br>+0.015 | 12<br>+0.064 | 10.38±0.15         |
| 3. light | 26.32<br>+0.33    | 9.93<br>+0.10  | 14.92<br>+0.17                 | 47.97<br>+0.28   | 99.14  | 12.765<br>+0.160       | 2.661<br>+0.027 | 1.617<br>+0.018 | 12<br>+0.070 | 7.42±0.09          |
| 4. dark  | 25.88<br>+0.32    | 13.30<br>+0.11 | 11.88<br>+0.15                 | 49.59<br>+0.28   | 100.66 | 12.142<br>+0.152       | 3.447<br>+0.028 | 1.244<br>+0.016 | 12<br>+0.068 | 9.65±0.14          |
| 5. light | 28.00<br>+0.35    | 10.38<br>+0.10 | 14.61<br>+0.17                 | 49.10<br>+0.28   | 102.10 | 13.265<br>+0.166       | 2.719<br>+0.026 | 1.544<br>+0.018 | 12<br>+0.070 | 7.77±0.10          |

|            |                |                |                |                |        |                  |                 |                 |              |           |
|------------|----------------|----------------|----------------|----------------|--------|------------------|-----------------|-----------------|--------------|-----------|
| 6. centrum | 19.34<br>+0.26 | 6.80<br>+0.08  | 19.09<br>+0.19 | 49.99<br>+0.28 | 95.22  | 8.997<br>+0.121  | 1.749<br>+0.021 | 1.982<br>+0.020 | 12<br>+0.067 | 6.05+0.07 |
| 7. light   | 27.20<br>+0.34 | 10.05<br>+0.10 | 14.79<br>+0.17 | 48.54<br>+0.28 | 100.58 | 13.039<br>+0.163 | 2.663<br>+0.026 | 1.582<br>+0.018 | 12<br>+0.069 | 7.59+0.10 |
| 8. light   | 26.43<br>+0.33 | 10.85<br>+0.10 | 14.07<br>+0.16 | 48.03<br>+0.27 | 99.39  | 12.803<br>+0.160 | 2.906<br>+0.027 | 1.523<br>+0.017 | 12<br>+0.067 | 7.88+0.10 |
| 9. dark    | 26.49<br>+0.33 | 12.59<br>+0.11 | 11.80<br>+0.16 | 48.53<br>+0.28 | 99.41  | 12.699<br>+0.158 | 3.334<br>+0.029 | 1.263<br>+0.017 | 12<br>+0.069 | 9.50+0.14 |
| 10. light  | 27.26<br>+0.33 | 11.47<br>+0.10 | 13.58<br>+0.14 | 48.78<br>+0.26 | 101.09 | 13.006<br>+0.157 | 3.023<br>+0.026 | 1.446<br>+0.015 | 12<br>+0.064 | 8.30+0.10 |
| 11. dark   | 26.72<br>+0.34 | 13.13<br>+0.12 | 11.42<br>+0.15 | 49.32<br>+0.28 | 100.59 | 12.605<br>+0.160 | 3.423<br>+0.031 | 1.201<br>+0.016 | 12<br>+0.068 | 9.99+0.14 |

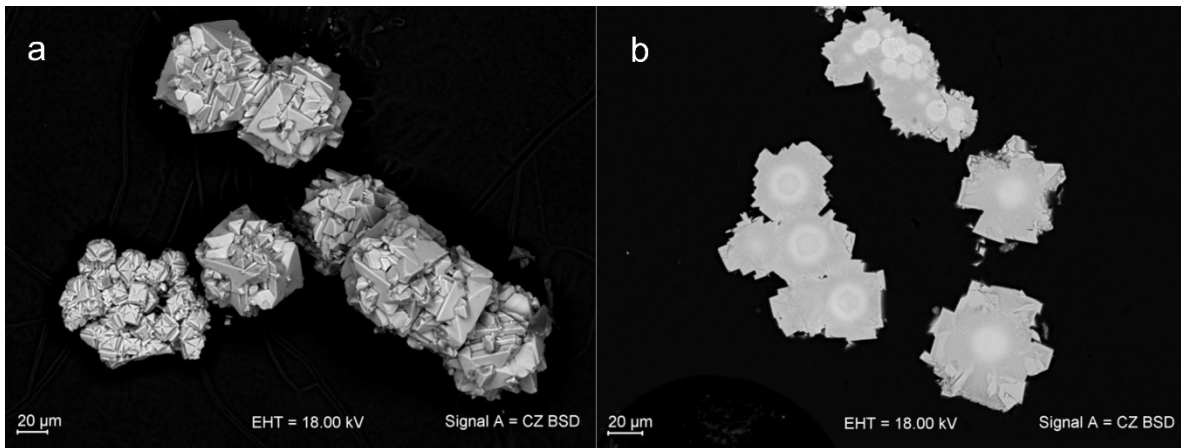

**Figure S1.** (a). Morphology of aggregates of intergrown crystals. Unpolished sample. BSE. (b). Cross-section of aggregates of intergrown crystals. All aggregates are characterized by zonal microstructure. Polished sample. BSE.

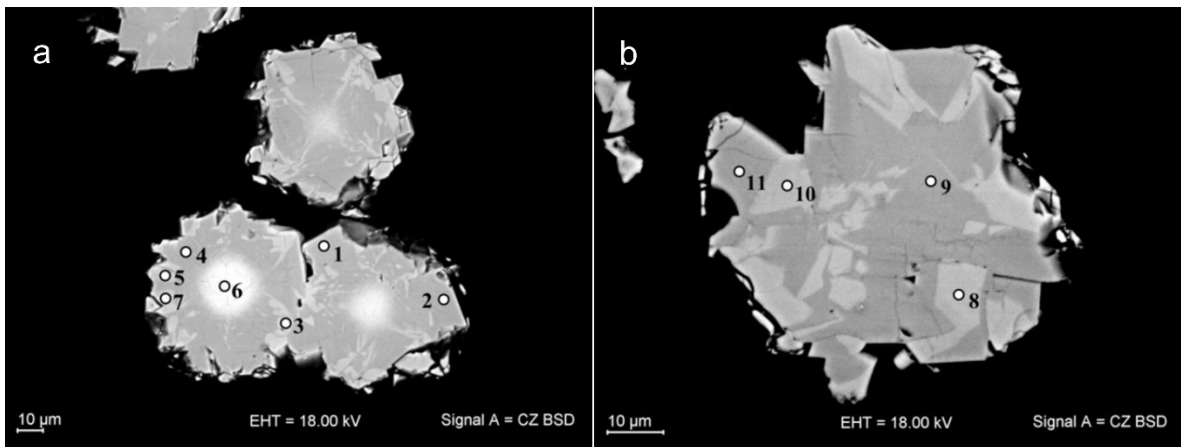

**Figure S2.** (a, b). Aggregates of intergrown crystals. Polished samples. BSE images. Rings and numeral symbols in the images indicate the position of points analyzed by EDS. The numeral symbols correspond to the analysis numbers in table 1.

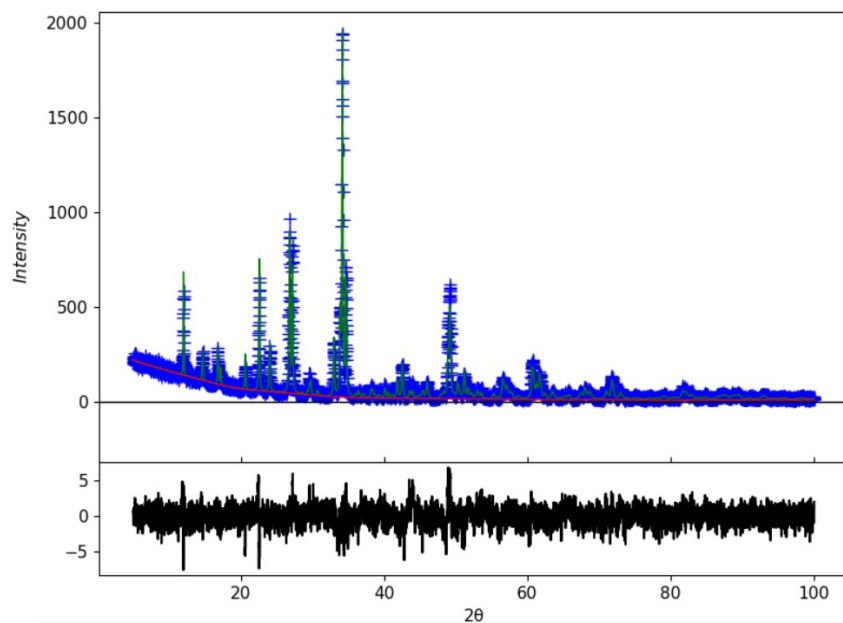

**Figure S3.** The final Rietveld pattern for MS-2. The (+) is the measured values and (green ) are the fitted ones; (black -) is the difference between the measured and the fitted values (CSD number 2151073).

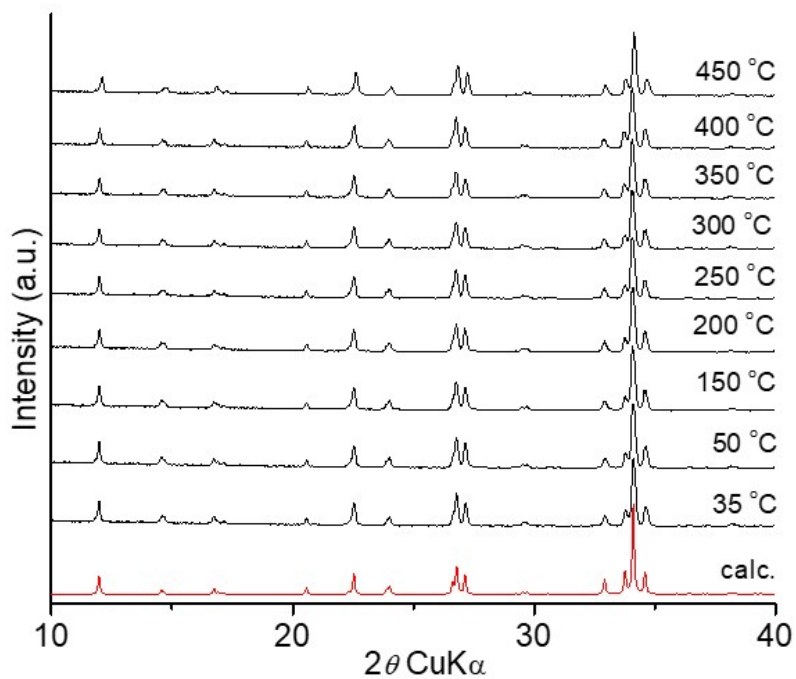

**Figure S4.** In situ temperature resolved powder XRD patterns of MS-2 compared with the XRD pattern calculated from the single crystal data.

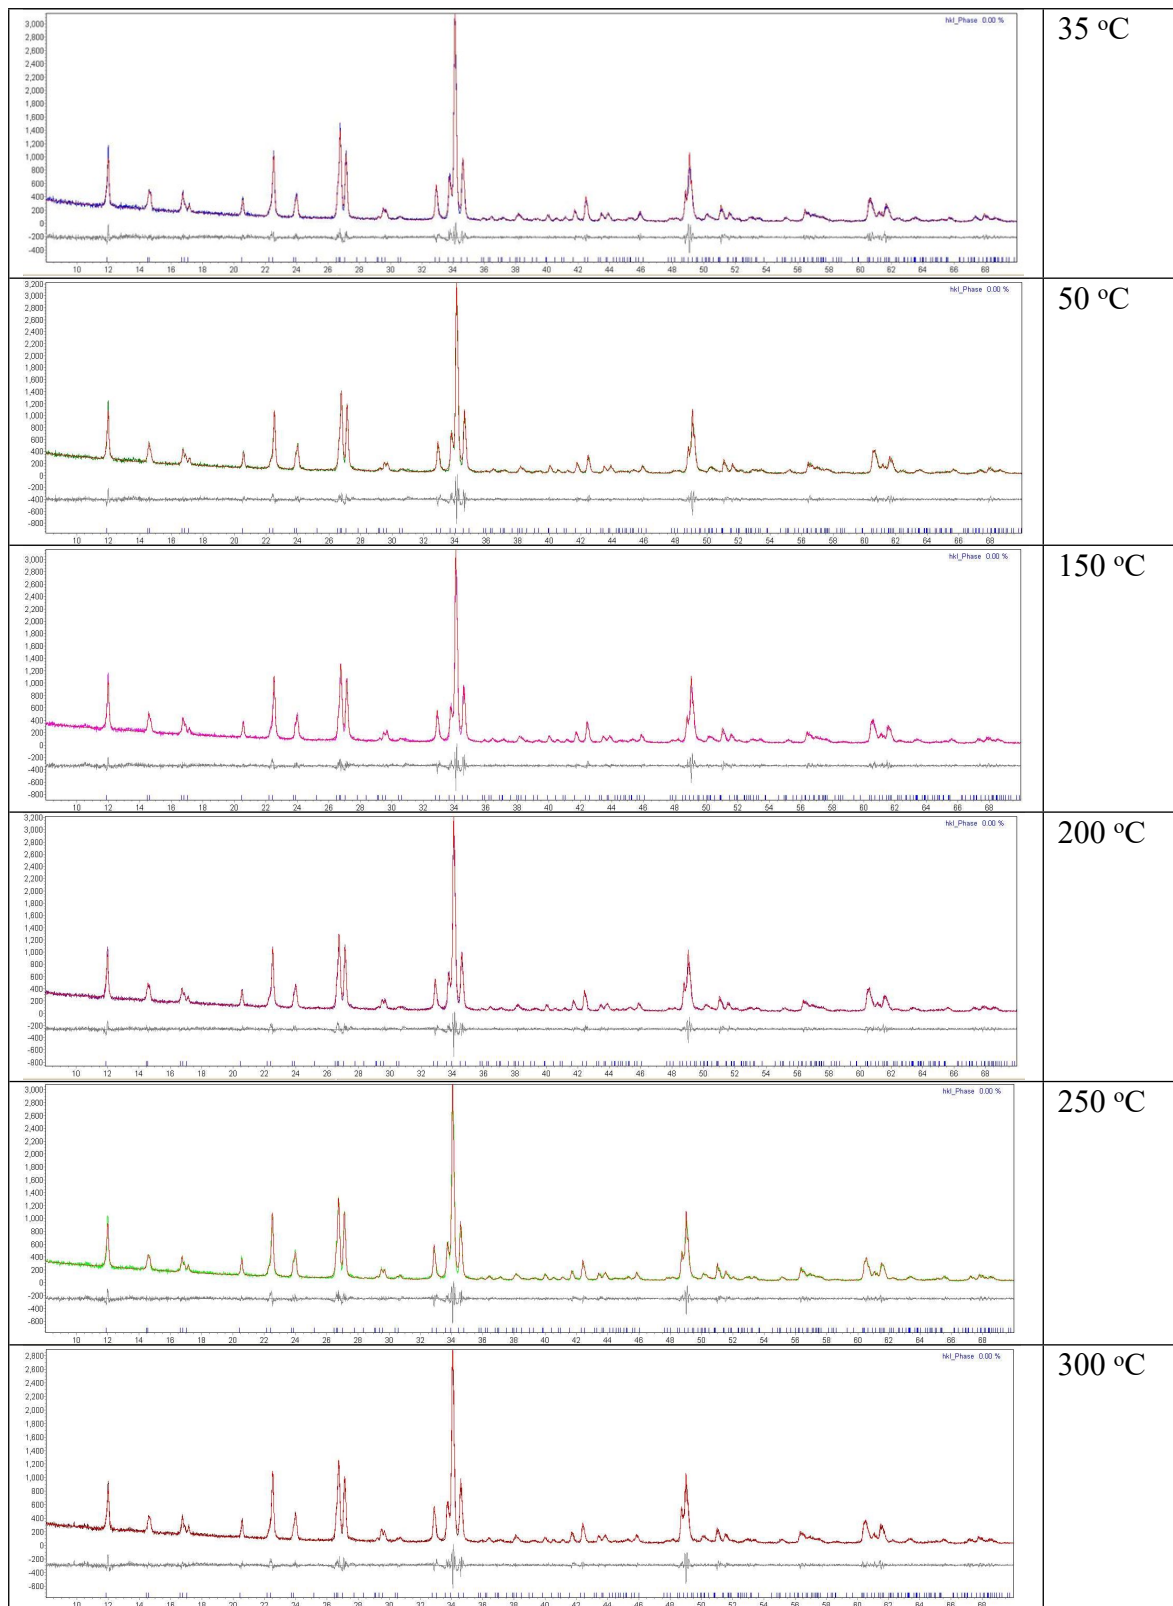

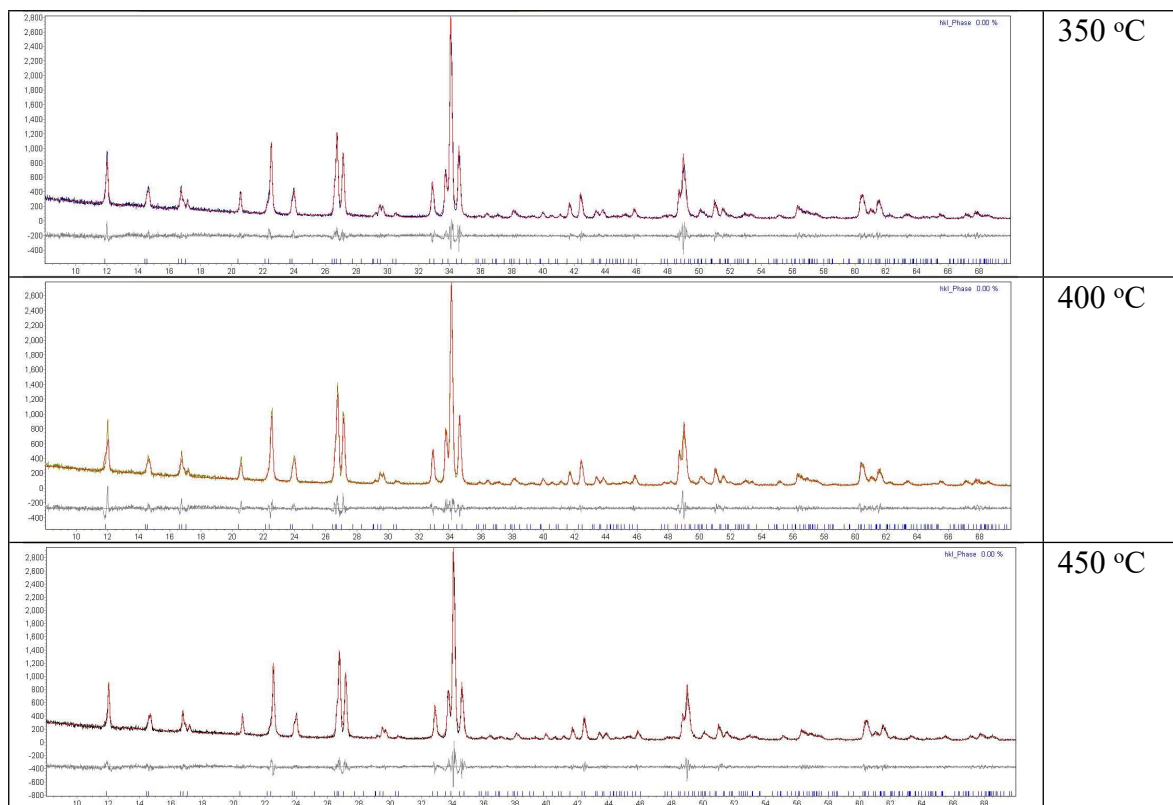

**Figure S5.** Le Bail fits of the powder XRD patterns collected at different temperatures.

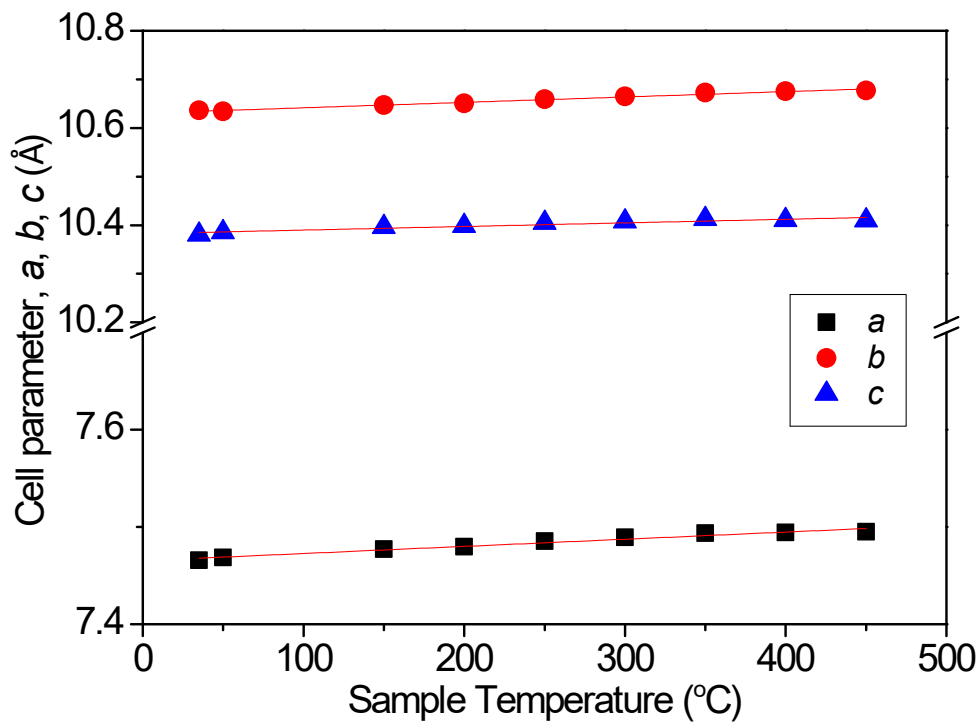

**Figure S6.** Change of the lattice parameters of MS-2 with increasing temperature.

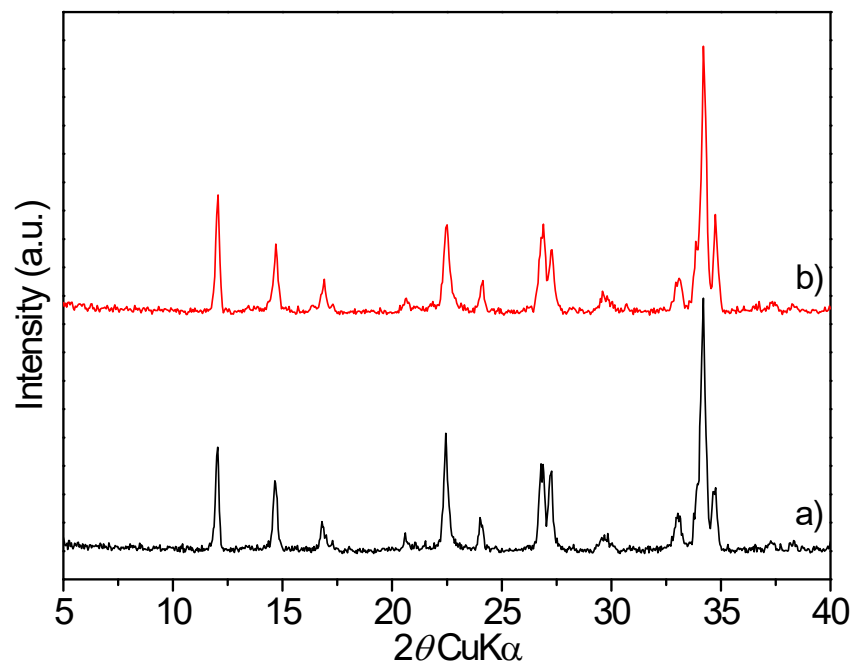

**Figure S7.** Powder XRD patterns of a) as-synthesized MS-2 and b) after heating at 900 °C.



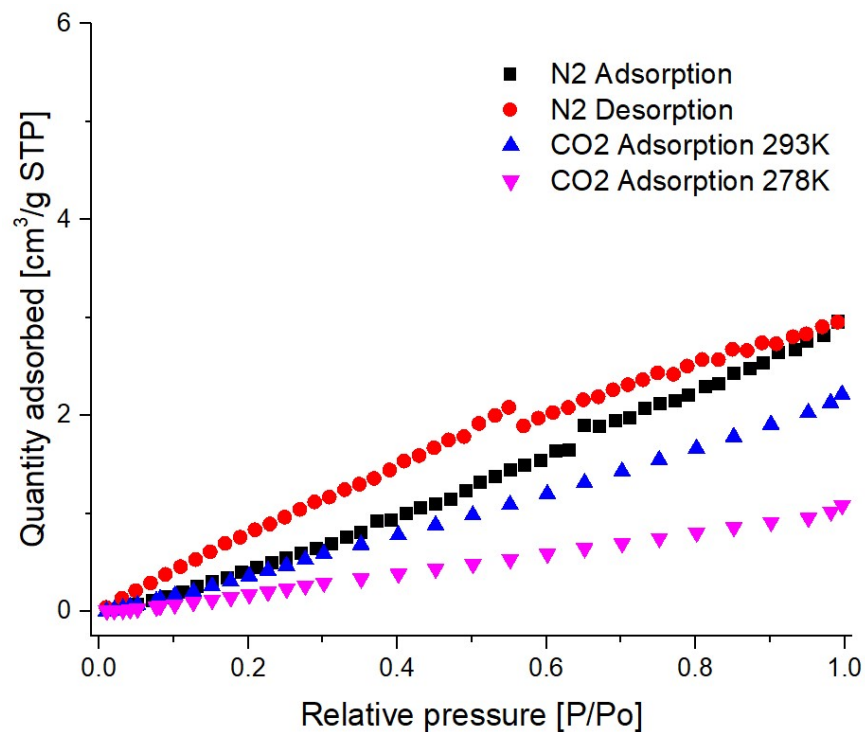

**Figure S8.** Linear plot of N<sub>2</sub> (77 K, squares and circles) and CO<sub>2</sub> (278 and 293 K, triangles) adsorption and desorption isotherms in In-imandrite (MS-2).

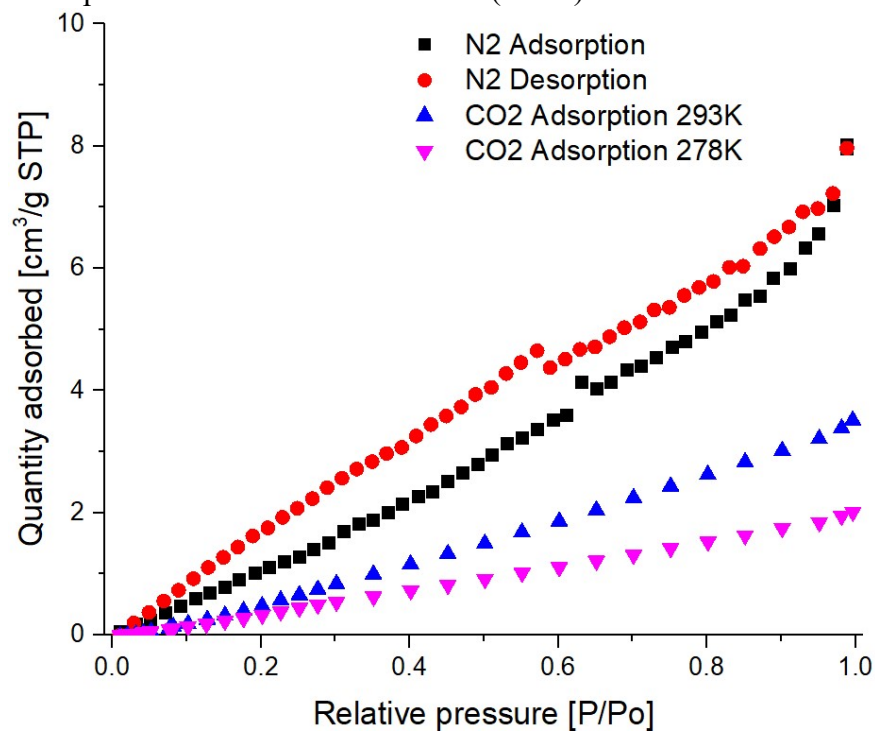

**Figure S9.** Linear plot of N<sub>2</sub> (77 K, squares and circles) and CO<sub>2</sub> (278 and 293 K, triangles) adsorption and desorption isotherms in Fe-imandrite (MS-1).

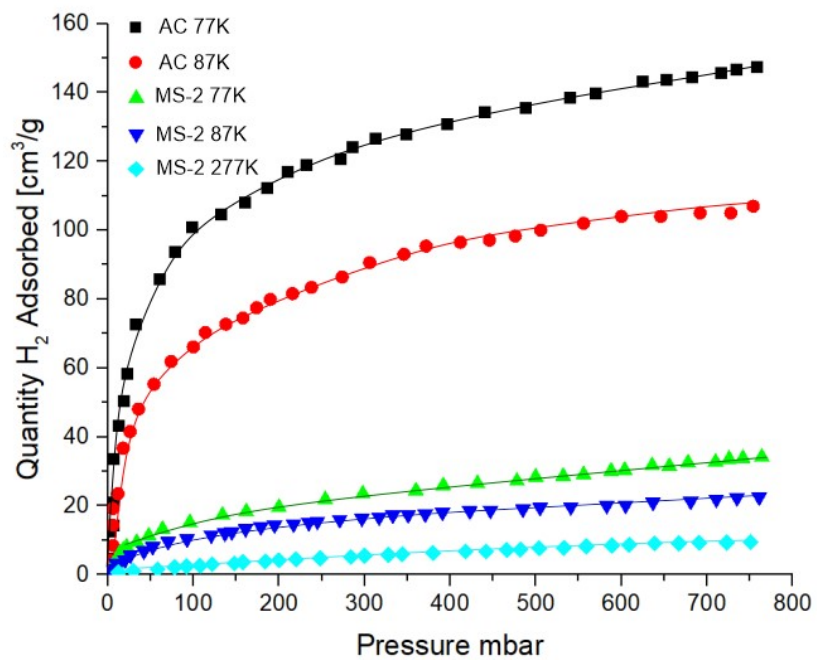

**Figure S10.** Hydrogen adsorption isotherm of and activated carbon (AC) and MS-2 at 77 and 277 K).

**Table S3.** Most important data collection and refinement parameters for the studied sample.

| <b>Compound</b>                                                   | <b>MS-2</b>                                                                              |
|-------------------------------------------------------------------|------------------------------------------------------------------------------------------|
| Chemical formula                                                  | Na <sub>6.23</sub> Ca <sub>1.62</sub> In <sub>0.68</sub> Si <sub>6</sub> O <sub>18</sub> |
| Formula weight                                                    | 743.55                                                                                   |
| Temperature/K                                                     | 290(2)                                                                                   |
| Crystal color                                                     | White / colorless                                                                        |
| Crystal system                                                    | Orthorhombic                                                                             |
| Space group                                                       | <i>P n n m</i>                                                                           |
| <i>a</i> /Å                                                       | 7.4634(5)                                                                                |
| <i>b</i> /Å                                                       | 10.6336(9)                                                                               |
| <i>c</i> /Å                                                       | 10.3869(7)                                                                               |
| $\alpha = \beta = \gamma/^\circ$                                  | 90                                                                                       |
| Volume/Å <sup>3</sup>                                             | 824.33(10)                                                                               |
| <i>Z</i>                                                          | 2                                                                                        |
| $\rho_{\text{calc}}$ (mg/cm <sup>3</sup> )                        | 2.996                                                                                    |
| $\mu/\text{mm}^{-1}$                                              | 2.213                                                                                    |
| <i>F</i> (000)                                                    | 725                                                                                      |
| Crystal size/mm <sup>3</sup>                                      | 0.01×0.01×0.01                                                                           |
| Radiation, $\lambda$ [ Å ]                                        | MoK $\alpha$ , $\lambda = 0.71073$                                                       |
| $\Theta$ range for data collection/ $^\circ$                      | 2.741 to 26.370                                                                          |
| Limiting indices                                                  | -9 $\leq h \leq$ 9, -13 $\leq k \leq$ 13, -12 $\leq l \leq$ 12                           |
| Reflections collected /unique                                     | 11991 / 890 [ <i>R</i> (int) = 0.0738]                                                   |
| Completeness to theta = 25.242                                    | 99.6 %                                                                                   |
| Refinement method                                                 | Full-matrix least-squares on <i>F</i> <sup>2</sup>                                       |
| Data/restraints/parameters                                        | 890 / 0 / 96                                                                             |
| Goodness-of-fit on <i>F</i> <sup>2</sup>                          | 1.146                                                                                    |
| Final <i>R</i> indexes [ <i>I</i> $\geq$ 2 $\sigma$ ( <i>I</i> )] | <i>R</i> 1 = 0.0395, <i>wR</i> 2 = 0.0742                                                |
| Final <i>R</i> indexes [all data]                                 | <i>R</i> 1 = 0.0458, <i>wR</i> 2 = 0.0766                                                |
| Largest diff. peak/hole /e Å <sup>-3</sup>                        | 0.545/-0.560                                                                             |

**Table S4.** Comparison of crystal structure parameters of the mineral imandrite, MS-1, and MS-2.

|                              | <b>Imandrite natural</b>                               | <b>MS-1</b>                                                  | <b>MS-2</b>                                                                |
|------------------------------|--------------------------------------------------------|--------------------------------------------------------------|----------------------------------------------------------------------------|
| Chemical composition         | $\text{Na}_6\text{Ca}_{1.5}\text{FeSi}_6\text{O}_{18}$ | $\text{Na}_{6.74}\text{Ca}_{1.25}\text{FeSi}_6\text{O}_{18}$ | $\text{Na}_{6.23}\text{Ca}_{1.62}\text{In}_{0.68}\text{Si}_6\text{O}_{18}$ |
| FW                           |                                                        | 717.84                                                       | 744.93                                                                     |
| SG                           | <i>P n n m</i>                                         | <i>P n n m</i>                                               | <i>P n n m</i>                                                             |
| <i>a</i> (Å)                 | 7.426                                                  | 7.4041(12)                                                   | 7.4634(8)                                                                  |
| <i>b</i> (Å)                 | 10.546                                                 | 10.5166(19)                                                  | 10.6365(11)                                                                |
| <i>c</i> (Å)                 | 10.331                                                 | 10.307(3)                                                    | 10.3840(11)                                                                |
| <i>V</i> (Å <sup>3</sup> )   | 809.068                                                | 802.5(3)                                                     | 824.33(15)                                                                 |
| FD (FC/1000 Å <sup>3</sup> ) |                                                        | 18                                                           | 16.98 / 16.22                                                              |
| Dx, g.cm <sup>-3</sup>       |                                                        | 2.971                                                        | 2.996                                                                      |

**Table S5.** Selected bond lengths (Å), for the studied compounds.

| <b>MS-2</b>        |                   | <b>MS-1</b>         |                 |
|--------------------|-------------------|---------------------|-----------------|
| <b>bond</b>        | (Å)               | <b>bond</b>         | (Å)             |
| <b>Si(1)-O(3)</b>  | <b>1.6270(13)</b> | <b>Si(1)-O(2)</b>   | <b>1.611(5)</b> |
| <b>Si(1)-O(4)</b>  | <b>1.637(3)</b>   | <b>Si(1)-O(4)</b>   | <b>1.580(5)</b> |
| <b>Si(1)-O(5)</b>  | <b>1.603(3)</b>   | <b>Si(1)-O(5)</b>   | <b>1.642(2)</b> |
| <b>Si(1)-O(6)</b>  | <b>1.570(3)</b>   | <b>Si(1)-O(6)</b>   | <b>1.647(5)</b> |
| Si(2)-O(1)         | 1.585(4)          | Si(2)-O(1)          | 1.603(6)        |
| Si(2)-O(2)         | 1.585(4)          | Si(2)-O(3)          | 1.578(6)        |
| Si(2)-O(4)x2       | 1.590(4)          | Si(2)-O(6)x2        | 1.648(5)        |
| <b>In-O(2)x2</b>   | <b>2.245(4)</b>   | <b>Fe-O(1)x2</b>    | <b>2.098(6)</b> |
| <b>In-O(5)x4</b>   | <b>2.222(3)</b>   | <b>Fe-O(2)x4</b>    | <b>2.075(5)</b> |
| M(1)-O(2)x4        | 2.653(3)          | Na(1)-O(2)x4        | 2.719(5)        |
| M(1)-O(3)x2        | 2.269(4)          | Na(1)-O(3)x2        | 2.266(6)        |
| M(1)-O(5)x2        | 2.608(3)          | Na(1)-O(5)x2        | 2.450(8)        |
| <b>M(2)-O(1)</b>   | <b>2.424(4)</b>   | <b>Na(2)-O(1)</b>   | <b>2.426(6)</b> |
| <b>M(2)-O(2)x2</b> | <b>2.491(3)</b>   | <b>Na(2)-O(2)x2</b> | <b>2.480(5)</b> |
| <b>M(2)-O(3)</b>   | <b>2.386(4)</b>   | <b>Na(2)-O(3)</b>   | <b>2.335(6)</b> |
| <b>M(2)-O(4)x2</b> | <b>2.304(3)</b>   | <b>Na(2)-O(4)x2</b> | <b>2.257(5)</b> |
| Na(1)-O(4) x 4     | 2.632(4)          | Na(4)-O(4) x 4      | 2.688(6)        |
| Na(1)-O(6) x 4     | 2.686(4)          | Na(4)-O(6) x 4      | 2.683(5)        |
| <b>Na(2)-O(1)</b>  | <b>2.768(2)</b>   | <b>Na(3)-O(1)</b>   | <b>2.607(3)</b> |

|                   |                   |                   |                 |
|-------------------|-------------------|-------------------|-----------------|
| <b>Na(2)-O(2)</b> | <b>2.613(2)</b>   | <b>Na(3)-O(2)</b> | <b>2.561(5)</b> |
| <b>Na(2)-O(3)</b> | <b>2.8069(17)</b> | <b>Na(3)-O(3)</b> | <b>2.742(3)</b> |
| <b>Na(2)-O(4)</b> | <b>2.793(3)</b>   | <b>Na(3)-O(4)</b> | <b>2.294(5)</b> |
| <b>Na(2)-O(4)</b> | <b>2.488(4)</b>   | <b>Na(3)-O(4)</b> | <b>2.586(6)</b> |
| <b>Na(2)-O(5)</b> | <b>2.607(4)</b>   | <b>Na(3)-O(5)</b> | <b>2.794(3)</b> |
| <b>Na(2)-O(6)</b> | <b>2.313(4)</b>   | <b>Na(3)-O(6)</b> | <b>2.508(6)</b> |
| <b>Na(2)-O(6)</b> | <b>2.633(4)</b>   | <b>Na(3)-O(6)</b> | <b>2.682(6)</b> |

**M1** = Ca1, Na11; **M2**=Ca2 Na21

### References

1. Scott, V.D. and Love, G. (Eds), Quantitative electron-probe microanalysis. 1983, 345 p. (Ellis Horwood Ltd).
